# Supplementary material
Source: PubMed Central journal article supplement (PMC555525)

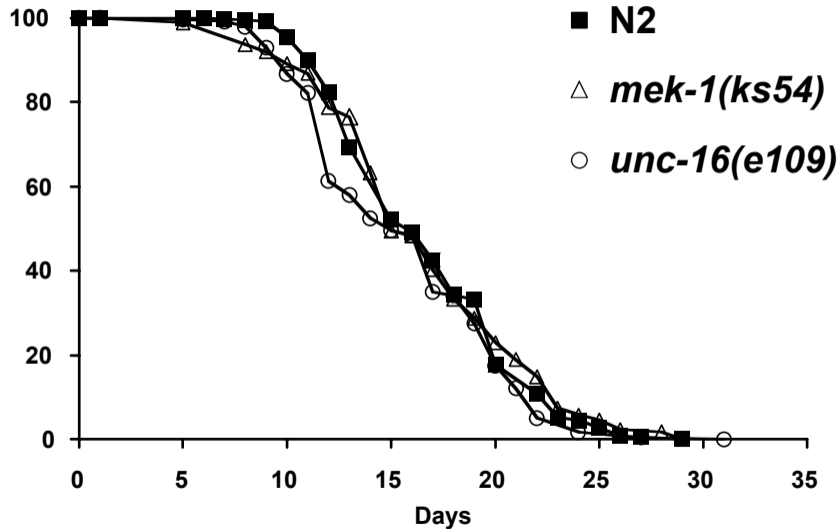

Supplement: pnas_102_12_4494__1.pdf [file pnas_102_12_4494__1.pdf]

## RT-PCR

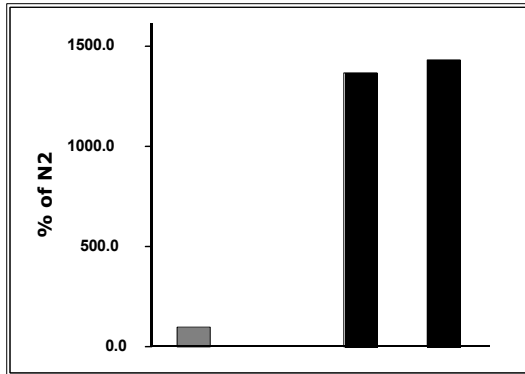

**N2 *jnk-1 lpln1 lpln2***

Supplement: pnas_102_12_4494__2.pdf [file pnas_102_12_4494__2.pdf]

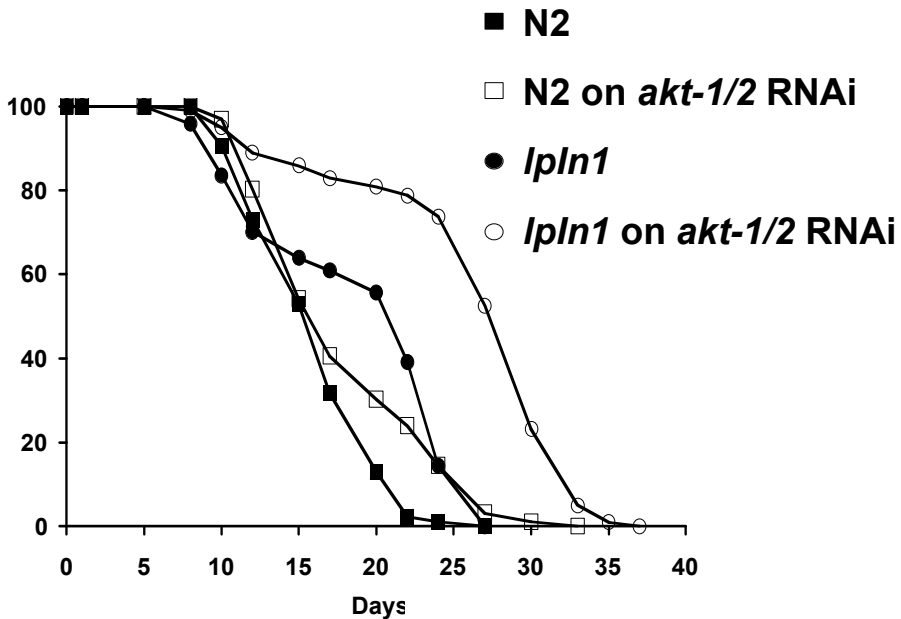

Supplement: pnas_102_12_4494__3.pdf [file pnas_102_12_4494__3.pdf]

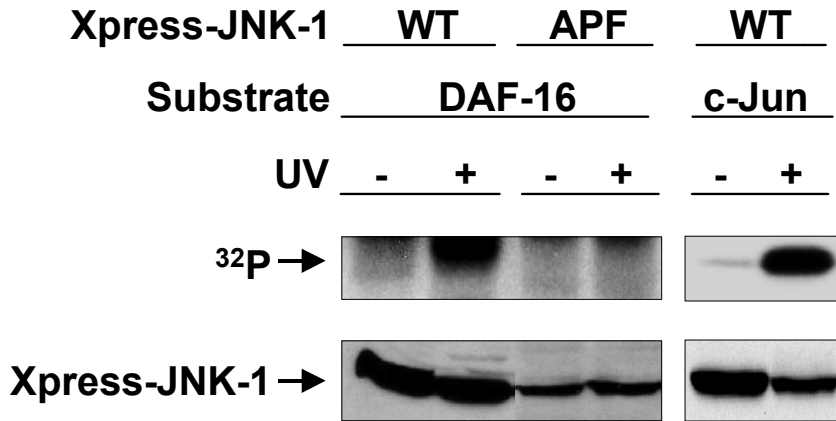

Supplement: pnas_102_12_4494__4.pdf [file pnas_102_12_4494__4.pdf]

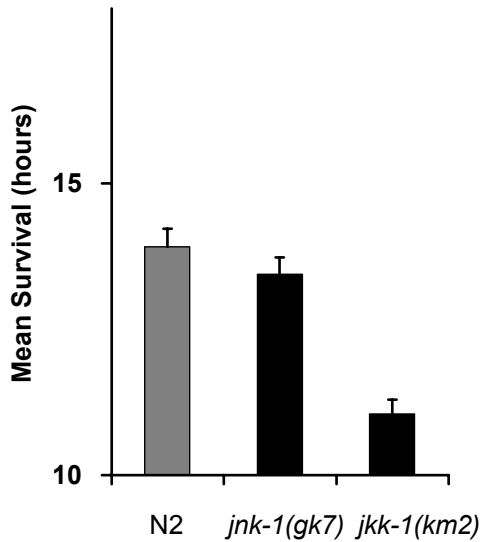

Supplement: pnas_102_12_4494__5.pdf [file pnas_102_12_4494__5.pdf]

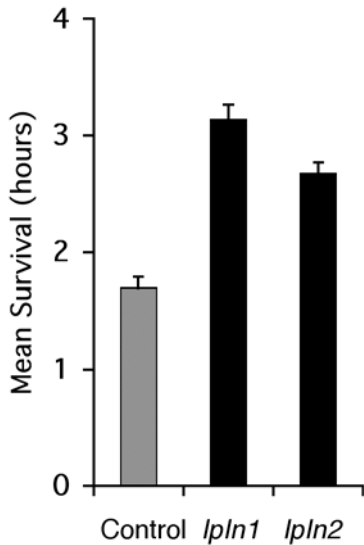

Supplement: pnas_102_12_4494__6.pdf [file pnas_102_12_4494__6.pdf]

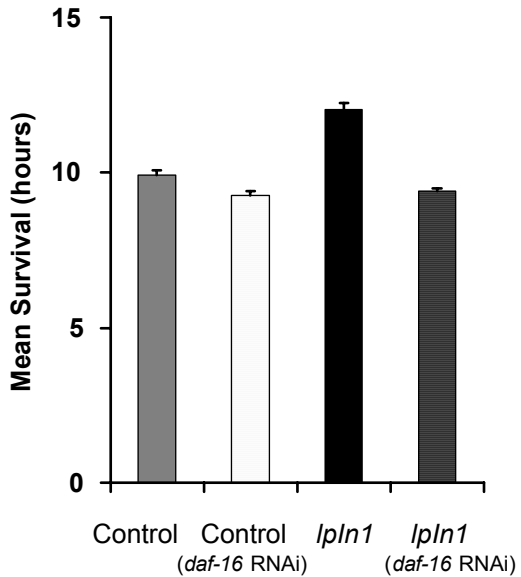

Supplement: pnas_102_12_4494__7.pdf [file pnas_102_12_4494__7.pdf]
